1

2

3

4 MxB restricts HIV-1 by targeting the tri-hexamer interface of the viral capsid

5

6

7 Smaga, Sarah Sierra<sup>1</sup>; Xu, Chaoyi<sup>2</sup>; Summers, Brady James<sup>1</sup>; Digianantonio, Katherine Marie<sup>1</sup>;

8 Perilla, Juan Roberto<sup>2</sup>; Xiong, Yong<sup>1</sup>

9

10 <sup>1</sup>Department of Molecular Biophysics and Biochemistry, Yale University, New Haven, CT, USA

11 <sup>2</sup>Department of Chemistry and Biochemistry, University of Delaware, Newark, DE, USA

12

13

14 \*Corresponding author

15 Email: [yong.xiong@yale.edu](mailto:yong.xiong@yale.edu)

16 **Abstract:**

17 Myxovirus resistance protein B (MxB) is an interferon-inducible restriction factor of HIV-1 that  
18 blocks nuclear import of the viral genome. Evidence suggests that MxB recognizes higher-order  
19 interfaces of the HIV capsid lattice, but the mechanistic details of this interaction are not known.  
20 Previous studies have mapped the restriction activity of MxB to its N-terminus encompassing a  
21 triple arginine motif <sup>11</sup>RRR<sup>13</sup>. Here we demonstrate a direct and specific interaction between the  
22 MxB N-terminus and helical assemblies of HIV-1 capsid protein (CA) using highly purified  
23 recombinant proteins. We performed thorough mutagenesis to establish the detailed molecular  
24 requirements for the CA interaction with MxB. The results map MxB binding to the interface of  
25 three CA hexamers, specifically interactions between positively charged MxB N-terminal  
26 residues and negatively charged CA residues. Our crystal structures show that the CA mutations  
27 affecting MxB interaction and restriction do not alter the conformation of capsid assembly. In  
28 addition, 30 microsecond long all-atom molecular dynamics (MD) simulations of the complex  
29 between the MxB N-terminus and the HIV CA tri-hexamer interface show persistent MxB  
30 binding and identify a MxB-binding pocket surrounded by three CA hexamers. These results  
31 establish the molecular details of the binding of a lattice-sensing host factor onto HIV capsid, and  
32 provide insight into how MxB recognizes HIV capsid for the restriction of HIV-1 infection.

33

34 **Author summary:**

35 The human antiviral protein MxB is a restriction factor that fights HIV infection. Previous  
36 experiments have demonstrated that MxB targets the HIV capsid, a protein shell that protects the  
37 viral genome. To make the conical shaped capsid, HIV CA proteins are organized into a lattice  
38 composed of hexamer and pentamer building blocks, providing many interfaces for host proteins  
39 to recognize. Through extensive biochemical and biophysical studies and molecular dynamics  
40 simulations, we show that MxB is targeting the HIV capsid by recognizing the region created at  
41 the intersection of three CA hexamers. We are further able to map this interaction to a few CA  
42 residues, located in a negatively-charged well at the interface between the three CA hexamers.

43 This work provides detailed residue-level mapping of the targeted capsid interface and how MxB  
44 interacts. This information could inspire the development of capsid-targeting therapies for HIV.

#### 45 **Introduction:**

46 The Myxovirus resistance (Mx) proteins are dynamin-like GTPases with antiviral  
47 activity. The two Mx proteins found in humans, MxA and MxB, originated from an ancient gene  
48 duplication. MxA is a well-characterized restriction factor of influenza and a wide range of other  
49 viruses (reviewed in [1]). MxB was recently identified as an interferon-inducible restriction factor  
50 of HIV-1 and herpesviruses, as well as murine cytomegaloviruses (MCMV) [2-7]. In cells, MxB  
51 localizes to the nuclear periphery, potentially near nuclear pores [8, 9]. MxB appears to restrict  
52 HIV approximately 10-fold, and block infection between the steps of reverse transcription and  
53 integration [5-7, 9].

54 MxB is similar to MxA in both sequence and structure but with different viral restriction  
55 activities. Each of the Mx proteins is composed of three conserved domains: the stalk domain, the  
56 GTPase domain and the bundling signaling element (BSE) domain. The stalk domain is  
57 responsible for the oligomerization of Mx proteins. In MxA (and MxB restriction of  
58 herpesviruses and MCMV), the GTPase domain is essential for restriction activity [2-4, 6, 7]. The  
59 BSE transmits information between domains for viral inhibition [10]. The atomic resolution  
60 structures of MxA and MxB [10-12] have shed light on the overall architecture of Mx proteins.  
61 The structure of individual monomers is very similar, but substantial differences occur in the  
62 higher order dimerization and oligomerization of MxA and MxB [10, 11] Furthermore, MxB  
63 contains an N-terminal tail (43 amino acids) that is absent in MxA, and this N-terminus is missing  
64 or disordered in the available MxB structures. The unstructured N-terminus of MxB is essential  
65 for its restriction activity. Deleting the N-terminal region of MxB, or replacing it with the shorter  
66 N-terminus of MxA, abolishes MxB's restriction activity against HIV-1 [11, 13-15]. Importantly,  
67 the restriction activity of MxB can be abolished by mutating a triple arginine motif <sup>11</sup>RRR<sup>13</sup> to  
68 <sup>11</sup>AAA<sup>13</sup> [14].

69           The HIV-1 restriction activity of MxB is correlated to its ability to bind the viral capsid.  
70   It has been reported that certain mutations in the HIV-1 capsid protein (CA) reduce the potency of  
71   MxB restriction, suggesting that capsid plays a role in the restriction activity of MxB [5-7, 18].  
72   We and others observed that MxB binds to capsid *in vitro* by using helical assemblies of purified  
73   CA and in cells by using the viral capsid core [11, 13, 19]. However, MxB does not bind to the  
74   individual capsid building blocks: CA dimers, hexamers, or pentamers [11, 13, 19]. This suggests  
75   that MxB is recognizing a feature present only in the higher-order CA lattice on capsid,  
76   potentially at an interface between hexamer building blocks. Further evidence to support this  
77   hypothesis was provided in an *in vitro* evolution experiment that found two capsid mutations  
78   located in the interface between three capsid hexamers, G208R and T210K, that escaped MxB  
79   restriction. Other mutations, including P207S, M10I, and P90T, and M185L escaped MxB  
80   restriction to lesser degrees [9]. However, the direct role of these residues in CA-MxB  
81   interactions is not clear. These experiments were performed by passaging the virus in cell culture,  
82   where a capsid mutation that generates a defect in assembly, stability, or interaction with  
83   cofactors could affect viral sensitivity to MxB indirectly.

84           In the present work, we describe how MxB recognizes the HIV capsid by defining the  
85   MxB-CA binding interface. Using capsid co-pelleting assays with highly pure MxB and CA  
86   components, we performed comprehensive mutagenesis screening of capsid residues that  
87   potentially interact with MxB. Our data suggest that MxB recognizes the interface between three  
88   capsid hexamers, particularly through interactions between its basic <sup>11</sup>RRR<sup>13</sup> motif and acidic CA  
89   residues. Our crystal structures show that the MxB-resistant mutations at the tri-hexamer interface  
90   do not affect the structures of CA hexamers or the capsid lattice, though they do reduce MxB  
91   binding. In addition, results from long time-scale MD simulations demonstrate binding of MxB to  
92   the tri-hexamer interface of higher-order capsid assemblies. Furthermore, our simulations  
93   establish key residues in CA that mediate interactions with MxB's N-terminal domain, and are in  
94   agreement with the biochemical and biophysical experiments.

95 **Results:**

96 **The N-terminus of MxB binds directly to CA**

97 We produced a minimal MxB construct with good solution behavior and containing the  
98 established capsid-binding motif. Previous *in vitro* studies of MxB binding were limited by low  
99 yield and poor behavior of full-length MxB protein. Inspired by reports that the N-terminus of  
100 MxB dictates restriction and includes the positively charged RRR residues that potentially target  
101 capsid [11, 14, 19, 20], we focused our study on the N-terminal 35 residues of MxB. To mimic  
102 the extended dimeric architecture of the native protein, which has the two N-termini located at the  
103 opposite ends, we fused the N-terminal 35 residues of MxB (MxB<sub>1-35</sub>) to maltose binding protein  
104 (MBP). The MxB<sub>1-35</sub>-MBP fusion is further linked to a GCN4 dimerization helix to enforce a  
105 dimeric geometry (Fig 1A). The MBP acts as a spacer, creating a separation between the two  
106 MxB N-termini, and at the same time serves as a solubility enhancer. This construct, MxB<sub>1-35</sub>-  
107 MBPdi, provides a similar geometry to the extended MxB dimer, while allowing us to focus our  
108 study on the interactions of its N-terminus without the solution behavior complications of full-  
109 length MxB protein.

110 The MxB<sub>1-35</sub>-MBPdi construct binds directly to CA tubes *in vitro* in a co-pelleting assay,  
111 where a soluble capsid cofactor is found in the pellet only upon binding to insoluble polymerized  
112 CA [21-23]. We chose to use A14C/E45C disulfide-crosslinked CA tubes in our assay, which  
113 mimic the lattice seen in the capsid and tolerate a range of experimental conditions [24]. To  
114 quantify MxB binding, we compared the reduction of MxB in the soluble fraction, instead of the  
115 amount pelleted, relative to the total input. This approach measures binding at equilibrium and  
116 produces more accurate quantification than attempting to measure the MxB bound to the washed  
117 or unwashed CA pellet. The results show that over 90% of MxB<sub>1-35</sub>-MBPdi co-pellets with CA at  
118 3  $\mu$ M MxB concentration, indicating efficient binding under the experimental conditions and  
119 validating our MxB construct, which may be useful in future studies of MxB-capsid interactions  
120 (Fig 1B). The negative control, MBP alone, has a background level of less than 10% binding. As

121 expected, MxB<sub>1-35AAA</sub>-MBPdi, in which the triple arginine motif known to bind CA is mutated to  
122 <sup>11</sup>AAA<sup>13</sup>, showed much weaker binding than wild-type at 20%. This further validates the  
123 construct and the residual binding may indicate that additional residues outside of <sup>11</sup>RRR<sup>13</sup> play a  
124 minor role in capsid interaction.

125 The binding of MxB<sub>1-35</sub>-MBPdi to CA tubes decreases upon increasing salt concentration,  
126 suggesting that the interaction is driven by electrostatic interactions. At 75mM NaCl, over 90% of  
127 MxB<sub>1-35</sub>-MBPdi binds to CA tubes (Fig 1C and 1D). At the near-physiological salt concentration  
128 of 150mM NaCl, MxB<sub>1-35</sub>-MBPdi retains around 80% of binding. However, at above 300mM  
129 NaCl, the binding of MxB<sub>1-35</sub>-MBPdi is reduced to the ~20% residual level of binding observed in  
130 MxB<sub>1-35AAA</sub>-MBPdi. The low-level binding of MxB<sub>1-35AAA</sub>-MBPdi is consistent within error  
131 across concentrations of NaCl, suggesting that any remaining interactions may not be charge-  
132 driven. To investigate the intrinsic interaction property and more easily distinguish potential  
133 subtle mutagenesis effects, we performed subsequent assays at 75mM NaCl, where binding is at  
134 its maximum.

### 135 MxB interacts with CA at the interface between three hexamers

136 We predicted that the positively-charged <sup>11</sup>RRR<sup>13</sup> motif of MxB would interact with  
137 negatively-charged regions of the CA lattice surface based on its charge character and our  
138 observation that MxB binding to CA tubes is salt-dependent. We identified three regions of  
139 negative charge on the CA lattice from its calculated surface electrostatic potential distribution  
140 (Fig 2A). The residues that contribute to these negatively charged regions include: E71, E75,  
141 E212 and E213 at the tri-hexamer interface, E180 and E187 at the di-hexamer interface, and E98  
142 in the CypA-binding loop (Fig 2B). Furthermore, based on the previous observation that  
143 individual CA hexamers are not sufficient to confer MxB binding, we posit that the tri-hexamer  
144 or di-hexamer interface residues are important for MxB binding. To test these hypotheses, we  
145 mutated each of these glutamates, as well as residues in the CypA-binding loop, to alanine and

146 tested their ability to interact with MxB<sub>1-35</sub>-MBPdi in our co-pelleting assay. Our binding results  
147 pinpoint the MxB-interacting site at the tri-hexamer interface.

148 Mutations in tri-hexamer interface residues had the greatest effect on MxB binding. This  
149 region of the CA lattice contains the densest concentration of negative charge, with 12 glutamate  
150 residues (three copies of E71, E75, E212 and E213) creating a deep well of negative charge. In  
151 the tri-hexamer interface, three sets of CA CTD residues E212 and E213 from three adjacent  
152 symmetry-related monomers form the floor of this negatively charged well. MxB binding to  
153 CA<sub>E213A</sub> was significantly reduced, and CA<sub>E212A/E213A</sub> drastically reduced binding to the  
154 background level (Fig 2C and 2D). The CA NTD residues E71 and E75 form the wall of the  
155 negatively charged well and mutations at these sites (CA<sub>E71A</sub> and CA<sub>E75A</sub>) also substantially  
156 reduced MxB binding (Fig 2C and 2D).

157 Mutation of residues in the di-hexamer interface has a mild effect on MxB binding. This  
158 interface is present in the WT CA dimer, which showed no binding to MxB in solution in  
159 previous experiments [11]. We identified glutamates E180 and E187 on helix 9 at the CTD-CTD  
160 dimerization interface as responsible for the patch of negative charge between two CA hexamers.  
161 Both CA<sub>E180A</sub> and CA<sub>E187A</sub> modestly affected MxB binding (Fig 2C and 2D). This suggests they  
162 do not contribute substantially to the MxB interaction.

163 In contrast to the effect from perturbations at the hexamer interfaces, mutation of residues  
164 around the CypA-binding loop on the surface of the CA hexamer had no effect on MxB binding.  
165 The most prominent region of negative charge on the hexamer surface is contributed by residue  
166 E98 near the CypA-binding loop, which is not near any lattice interfaces. Consistent with our  
167 interface-binding hypothesis, MxB<sub>1-35</sub>-MBPdi bound CA<sub>E98A</sub> tubes at a level similar to CA tubes  
168 (Fig 2C and 2D). We additionally examined the interactions of MxB<sub>1-35</sub>-MBPdi with CA tubes  
169 having mutations in the CypA-binding loop. Since the G89V and P90A mutations have been  
170 reported to affect MxB restriction *in vivo* and G89V has been reported to reduce MxB copelleting  
171 of MxB in cell lysates with CANC tubes [6, 7, 13], we tested these two mutations in our *in vitro*

172 system using purified MxB and CA components. Our previous work demonstrated that G89V had  
173 no effect on full-length MxB pelleting [11]. Using our minimal MxB-MBPdi construct, we  
174 confirmed that neither CA<sub>G89V</sub> nor CA<sub>P90A</sub> reduce the binding (Fig 2C and 2D).

### 175 Tri-hexamer interface mutations that escape MxB restriction also abolish MxB<sub>1-35</sub>-MBPdi 176 binding

177 Three mutations at the tri-hexamer interface (P207S, G208R and T210K) (Fig 4A) were  
178 previously identified in an *in vitro* evolution experiment to escape MxB restriction to varying  
179 degrees [9]. The mutation P207S is relatively conservative, while both G208R and T210K  
180 introduce bulky, positively charged residues to the predominantly negatively charged  
181 environment described above (Fig 2A, 3A). Based on our interaction mapping results, we  
182 predicted that both G208R and T210K, which drastically alter the electrostatic environment of the  
183 tri-hexamer interface, would decrease MxB binding to capsid. To test this hypothesis, we  
184 introduced these mutations into CA tubes and performed co-pelleting assays with MxB<sub>1-35</sub>-  
185 MBPdi.

186 The CA mutations G208R and T210K drastically reduced MxB binding (Fig 3B). MxB<sub>1-  
187 35</sub>-MBPdi binding to CA<sub>G208R</sub> was indistinguishable from the MxB<sub>1-35-AAA</sub>-MBPdi background  
188 signal. Binding to CA<sub>T210K</sub> was also substantially reduced. By neutralizing the strong negative  
189 charge at the tri-hexamer interface, these mutations likely disrupt charge-charge interactions that  
190 are required for MxB binding. It is also possible that the bulkiness of these residues occludes the  
191 well at the tri-hexamer interface and sterically blocks MxB access. The relatively modest  
192 mutation P207S had a minor effect on MxB interaction (Fig 3B). These data lend strong support  
193 to our mapping results that identify the MxB targeting site to the tri-hexamer interface on capsid.



194 **Hexamer interface mutations that affect MxB interaction do not change the conformation**  
 195 **of CA lattice**

196 We validated that the reduction in MxB binding observed for the hexamer interface  
 197 mutations was due to a direct disruption in the MxB-capsid interface and not due to indirect  
 198 changes in the CA lattice by examining the structure. Large conformational changes in the overall  
 199 CA lattice could potentially lead to the loss of MxB binding at other sites. We first validated the  
 200 overall morphology of the CA mutants tested by examining crosslinked CA tubes with negative  
 201 stain electron microscopy. Morphologically, all CA mutant tubes appear similar to crosslinked  
 202 tubes without mutation (SI Appendix 2). We further determined the crystal structures of those CA  
 203 mutants that affect MxB restriction – P207S, G208R, and T210K – at resolutions ranging from  
 204 3.0Å to 3.3Å (Table 1). These mutants crystalized in the same crystal form as that of the WT CA,  
 205 where the crystal packing recapitulates the CA lattice on the viral capsid [25]. The crystal  
 206 structures of the mutants closely align to the structure of WT CA, both at the individual CA  
 207 monomer level (RMSD 0.2-0.3 Å) and lattice level (RMSD 0.3-1.2 Å) for the six CA molecules  
 208 surrounding 3-fold axis between three hexamers) (Fig 3D and E). These results are consistent  
 209 with the idea that mutations at the tri-hexamer interface directly disrupt MxB-binding.

210 **Table 1: Crystal structures of CA mutants P207S, G208R, T210K**

|                         | <b>P207S</b>        | <b>G208R</b>        | <b>T210K</b>        |
|-------------------------|---------------------|---------------------|---------------------|
| PDB ID:                 | 6MQA                | 6MQO                | 6MQP                |
| <b>Data Collection</b>  |                     |                     |                     |
| Space group             | P6                  | P6                  | P6                  |
| Cell dimensions         |                     |                     |                     |
| a, b, c                 | 90.34, 90.34, 57.62 | 92.01, 92.01, 57.19 | 92.04, 92.04, 57.35 |
| $\alpha, \beta, \gamma$ | 90, 90, 120         | 90, 90, 120         | 90, 90, 120         |
| Molecules/ASU           | 1                   | 1                   | 1                   |
| Resolution (Å)          | 3.20 (3.39-3.20)    | 3.00 (3.18-3.00)    | 3.30 (3.49-3.30)    |
| $R_{merge}$             | 12.8                | 10.4                | 13.9                |
| $I/\sigma$              | 6.6 (1.4)           | 10.7 (2.7)          | 7.6 (1.7)           |
| Completeness (%)        | 98.9 (99.1)         | 98.3 (97.3)         | 99.3 (99.4)         |
| Redundancy              | 2.6                 | 3.1                 | 3.5                 |
| Unique reflections      | 8591 (1377)         | 8809 (1407)         | 8116 (1320)         |
| <b>Refinement</b>       |                     |                     |                     |

|                                          |           |           |           |
|------------------------------------------|-----------|-----------|-----------|
| # of non-hydrogen atoms                  | 1666      | 1693      | 1644      |
| R <sub>work</sub> /R <sub>free</sub> (%) | 18.6/21.9 | 20.6/27.1 | 20.7/24.0 |
| Average B factor                         | 73.6      | 76.0      | 87.6      |
| Root mean-squared deviation (rmsd)       |           |           |           |
| Bond lengths                             | 0.005     | 0.017     | 0.01      |
| Bond angles                              | 1.0       | 1.8       | 1.1       |
| Ramachandran analysis                    |           |           |           |
| Preferred regions (%)                    | 97.14     | 97.64     | 98.11     |
| Allowed regions (%)                      | 2.86      | 2.36      | 1.42      |
| Outliers (%)                             | 0         | 0         | 0.47      |

211 Data collection and refinement statistics for CA<sub>P207S</sub>, CA<sub>G208R</sub>, CA<sub>T210K</sub>. Values shown in  
212 parentheses are for highest-resolution shell.

213  
214 During purification, we observe that CA<sub>G208R</sub> and CA<sub>T210K</sub> formed hyperstable CA  
215 assemblies. These proteins have substantially lower solubility and visibly polymerize upon  
216 concentration and freeze/thaw. We believe this is due to the introduction of positive charge at a  
217 negatively-charged region of the CA lattice, resulting in charge neutralization that increases the  
218 stability of the CA lattice. In wild-type CA, it is likely that ideal lattice stability is maintained  
219 through balanced repulsion of negative charges at this interface. However, in the G208R and  
220 T210K mutants, the total negative charge at this interface is reduced, resulting in less lattice  
221 destabilizing repulsion force. A hyperstable capsid deviating from a fine balance could have  
222 deleterious effects for the virus, which may explain why these mutations are rarely seen in patient  
223 samples [26].

## 224 [Molecular dynamics simulations identify the tri-hexamer interface as the site of MxB-CA](#) 225 [interaction](#)

226 To investigate how MxB targets CA at an atomistic level, we constructed a CA tri-  
227 hexamer interface model and placed the 35 N-terminal residues of MxB (MxB<sub>1-35</sub>) in close  
228 proximity (Fig 4A). The model is composed of three dimers from adjacent CA hexamers, a  
229 structural motif commonly referred as a trimer-of-dimers. Subsequently, the model was subjected  
230 to thirty microseconds of all-atom MD simulation without any experimental restraints (SI Video  
231 1). The canonical MD simulations permit MxB's N-terminus and CA trimer-of-dimers to sample  
232 several physical conformations.

233 Results from our MD analysis show that MxB<sub>1-35</sub> binds persistently in the tri-hexamer  
234 region throughout the entirety of the simulation, with extensive molecular contacts between MxB  
235 N-terminal region and CA residues (Table 2). Importantly, CA residues in the tri-hexamer  
236 interface, E71, E75 and E213, interact with the <sup>11</sup>RRR<sup>13</sup> motif of MxB with high occupancies (Fig  
237 4D and Table 2), which is in good agreement with our co-pelleting assay data (Fig 2C and 2D). In  
238 fact, there is a remarkable agreement between the MD results with the experimental binding data  
239 obtained independently. For example, contacts between E212 and the MxB N-terminus were  
240 observed less frequently, which is consistent with the experimental finding that the E212A  
241 mutation has a smaller disruption of MxB binding than other glutamate mutations do at the tri-  
242 hexamer interface (Fig 2D). Moreover, we observe CA residues T210, G208, and P207  
243 interacting with the <sup>11</sup>RRR<sup>13</sup> motif of MxB, which accounts for the importance of these sites in  
244 MxB binding (Fig 3B) and sensitivity [9]. In addition, we found contacts between CA and  
245 residues outside of the <sup>11</sup>RRR<sup>13</sup> motif (Table 2, SI Appendix 3), for example the cation- $\pi$   
246 interaction between CA R82 and MxB W8 residue, which may contribute to the residual level of  
247 binding observed with MxB<sub>1-35AAA</sub>-MBPdi.

248 **Table 2: Top 20 MxB-CA contacts from all-atom MD simulation**

249

| #  | MxB residue | CA residue | Occupancy (%) |
|----|-------------|------------|---------------|
| 1  | ARG12       | GLU213     | 95.2          |
| 2  | TRP8        | ARG82      | 94.1          |
| 3  | ARG11       | THR210     | 91.1          |
| 4  | TYR10       | GLU75      | 90.6          |
| 5  | ARG12       | PRO207     | 88.8          |
| 6  | ARG12       | LEU205     | 87.4          |
| 7  | ARG12       | GLY208     | 84.5          |
| 8  | TYR10       | ALA78      | 83.9          |
| 9  | ARG11       | GLY208     | 74.8          |
| 10 | ARG11       | GLU71      | 68.8          |
| 11 | LYS6        | THR210     | 68.5          |
| 12 | ARG13       | GLU213     | 66.9          |
| 13 | ARG13       | THR210     | 65.2          |
| 14 | LYS6        | GLU75      | 63.5          |
| 15 | ARG11       | PRO207     | 61.4          |
| 16 | ARG11       | GLU75      | 60.1          |

|    |       |        |      |
|----|-------|--------|------|
| 17 | PRO9  | GLY208 | 59.6 |
| 18 | ARG12 | ALA209 | 59.6 |
| 19 | PRO7  | THR210 | 56.8 |
| 20 | HIS5  | ALA78  | 53.0 |

250 MxB and CA residue that were experimentally mutated are shown in blue and red, respectively.

251

252

253

254

255

256

257

258

259

260

261

262

263

264

265

266

267

268

269

270

271

272

273

274

The MxB-binding pocket revealed by the simulation is primarily formed by key CA residues located in adjacent CA hexamers (Table 2 and Fig 4D and SI Appendix 3). The MxB <sup>11</sup>RRR<sup>13</sup> motif is anchored to the bottom of the pocket, primarily interacting with the negatively-charged CA E213 residues, while the rest of the MxB<sub>1-35</sub> peptide exhibits significantly higher flexibility (Fig 4D and SI Video 1). This observation is supported by the experimental finding that the E213A mutation shows the largest effect on MxB binding (Fig 2D). Notably, the significant difference in effect between E212A and E213A on MxB binding is consistent experimentally and computationally. This is likely due to their relative positions at the interface: E213 is closer to the 3-fold symmetry axis (Fig 2b) and other E213 residues from adjacent hexamers, such that MxB can bind E213 from multiple CA monomers simultaneously (Fig 4D). Bioinformatics tools predict the MxB N-terminal region to be disordered by itself, and it is either disordered or not present in the available 3D structures of MxB [11, 27]. Our secondary structure analysis (Fig 4B) shows that while the bound MxB<sub>1-35</sub> still contains large disordered areas, the region near <sup>11</sup>RRR<sup>13</sup> motif maintains a stable conformation during the simulation (SI Video 1), which further supports the importance of the <sup>11</sup>RRR<sup>13</sup> motif in MxB-capsid interaction.

In addition, the MD simulation provides insight into the structure of the MxB<sub>1-35</sub> upon binding to capsid and its influence on the ionic environment. The simulation shows that binding of MxB<sub>1-35</sub> in the tri-hexamer interface decreases the sodium ion occupancies in the CA lattice. Based on the trajectory analysis, when the MxB N-terminal region occupies one of the three grooves between hexamers at the tri-hexamer interface, the calculated occupancy of sodium ions in the groove proximal to the bound region are lower than corresponding regions in the other two unoccupied grooves (SI Appendix 4). On the other hand, the chloride ion occupancy does not show appreciable difference in three grooves. Together with the high-occupancy molecular

275 contacts between the positively charged <sup>11</sup>RRR<sup>13</sup> and the CA glutamates in the tri-hexamer  
276 region, these data agree with the experimental observation that MxB binding is salt-dependent,  
277 the interaction may lead to displacement of sodium ions at both the binding interface and nearby  
278 regions.

279

## 280 **Discussion**

281 MxB is a potent restriction factor of HIV-1 infection. It restricts the nuclear important  
282 step of the viral life cycle. The inhibition requires an interaction with the HIV-1 capsid. Previous  
283 studies suggested that MxB recognized features present only in assembled capsid: interfaces  
284 between CA hexamers forming a lattice. Despite extensive work to identify CA mutations which  
285 affect MxB activity [5-7, 9, 11, 13, 18, 28], the interaction site and mechanism of interaction  
286 remain unclear. While cellular assays are efficient ways to identify mutations, they often fall short  
287 of disentangling the pleomorphic effects of CA mutations, where a functional defect in MxB  
288 sensitivity may not be directly related to MxB binding to capsid. Instead, it could be due to  
289 altered capsid stability or affecting other cellular factors that are also important in the MxB  
290 restriction pathway. Our biochemical and biophysical experimental system provides a stringent  
291 test to identify and verify mutations that have a direct effect on the MxB-capsid interaction.  
292 Combined with all-atom molecular dynamic simulations, our results demonstrate the molecular  
293 basis of how capsid mutations evade MxB restriction and provide insight into how MxB  
294 recognizes the capsid (Fig 5A).

295 Our results paint a clear picture of MxB targeting HIV capsid at the interface between  
296 CA hexamers. To map the site of the MxB-capsid interaction, we performed systematic alanine  
297 scanning guided by an analysis of the electrostatic surface of the CA lattice, as well as previously  
298 reported MxB-escape mutations [9, 29, 30]. Mutations of the negatively charge residues  
299 surrounding the 3-fold axis on capsid, including E71/E75/E212/E213, had substantial deleterious  
300 effect on MxB interaction. These residues line a negatively charge well at the tri-hexamer

301 interface, which is likely the binding site for the positively charged <sup>11</sup>RRR<sup>13</sup> motif in MxB that is  
302 critical for capsid interaction and HIV-1 restriction [14]. Consistently, we found that the tri-  
303 hexamer interface mutations that escape MxB restriction, G208R and T210K, also significantly  
304 disrupted the binding of MxB, likely due to a combined result of steric clash and charge repulsion  
305 with the <sup>11</sup>RRR<sup>13</sup> motif. In contrast, mutations in the di-hexamer interface and around the CypA-  
306 binding loop on the hexamer surface had little effect on MxB binding. Our structural studies  
307 showed these mutations had no apparent effect on the structure of CA lattice assemblies,  
308 supporting that the mutagenesis results revealed a direct binding of MxB at the tri-hexamer  
309 interface.

310         Though our mutant CA tubes are similar in morphology to that of wild-type CA, many of  
311 these mutations have deleterious effects in the virus, which may explain why MxB escape  
312 mutations are not commonly seen. Notably, it has been reported that the mutation E213A leads to  
313 decreased infectivity in cellular assays, and while Gag processing and viral cores appear normal,  
314 the core remains stable longer than wild-type upon entry into the target cell [31]. This is  
315 consistent with our observation during protein purification that E213A appeared to produce more  
316 stable CA assemblies and prone to precipitation. Viruses containing the CA mutations E71A and  
317 E180A had reduced infectivity relative to wild-type [32, 33]. The latter suggests that these two  
318 mutations are not tolerated well by the virus, and perhaps coping with MxB restriction is a lower-  
319 cost measure than evolving resistance.

320         Our all-atom molecular dynamics simulations identified the same important tri-hexamer  
321 interface independent of the experimental biochemistry. In the simulation, the bound MxB  
322 peptide interacts with many CA residues that were tested biochemically to be critical for MxB  
323 interaction (E71, E75, E212 and E213) and shown to be functionally important for MxB  
324 sensitivity (P207, G208, and T210). The extensive contacts between the MxB peptide and CA  
325 residues illustrate where and how MxB targets the CA lattice. Moreover, the glutamates in the tri-  
326 hexamer region, i.e. E213, create inter-hexamer repulsion and undermine the tri-hexamer

327 interface structure and thus the CA lattice [31]. Therefore, these MxB-CA contacts imply that the  
328 MxB N-terminus may stabilize the CA lattice by screening charge repulsions between inter-  
329 hexamer glutamates, introducing additional contacts connecting neighboring hexamers and  
330 reinforcing the tri-hexamer region in CA lattice. The inter-hexamer interactions give the capsid  
331 structural plasticity, which affects its stability [25]. It is possible that CA stabilization is related to  
332 how MxB restricts HIV, as altering the capsid stability likely disrupts the timing of uncoating and  
333 capsid-modulated processes such as nuclear import. Further study is necessary to test this  
334 hypothesis.

335         The interface recognized by MxB appears to be a conserved feature of lentiviral capsid  
336 structure. Structure-based sequence alignments show that the residues that make up the acidic  
337 grooves of the HIV capsid are conserved among lentiviruses, but not retroviruses more generally.  
338 Both Bovine Leukemia Virus (BLV) and Rous Sarcoma Virus (RSV), two divergent retroviruses  
339 not restricted by MxB, have surface charge and geometry drastically different from those of HIV  
340 [34, 35]. In the lentiviral family, available structures of Equine Infectious Anemia Virus (EIAV)  
341 and Feline Immunodeficiency Virus (FIV) capsid overlay well with the wild-type HIV capsid  
342 structure (Fig 5B) [36, 37]. Though non-primate lentiviruses appear to have the necessary capsid  
343 surface for MxB binding, they are not restricted by MxB, perhaps because they use different  
344 nuclear import pathways [38]. These observations suggest that the presence of a negatively-  
345 charged lattice interface may be necessary for MxB restriction, but that restriction may be  
346 dependent on other factors like nuclear import pathways.

347         The work presented herein advances the mechanistic understanding of MxB restriction in  
348 molecular detail. We defined the HIV-1 capsid site recognized by the MxB <sup>11</sup>RRR<sup>13</sup> motif to be  
349 the interface between three CA hexamers. This represents a residue-level mapping of a HIV-1  
350 capsid lattice-sensing restriction factor. Further work is needed to structurally characterize the  
351 interaction of MxB N-terminus and its interaction with CA. In addition, a better understanding of  
352 the binding affinity and behavior of the MxB oligomer will shed more light on its restriction. Due

353 to the conservation of this interface among retroviruses, the tri-hexamer interface may represent a  
354 general binding site for host factors and a fruitful target for novel therapeutics.

## 355 **Materials and methods**

### 356 **MxB<sub>1-35</sub>-MBP expression and purification**

357 Plasmids encoding MxB<sub>1-35</sub>-MBPdi and MxB<sub>1-35AAA</sub>-MBPdi were transformed in BL21(DE3)  
358 cells and grown in TB at 37C to an OD<sub>600</sub> of 0.4-0.6. Flasks were cooled, and 0.5mM IPTG was  
359 added to express the MxB-MBP protein at 18C overnight. Cells were centrifuged and pellets were  
360 resuspended in 40mL lysis buffer (50mM Tris pH8, 300mM NaCl, 0.2mM TCEP) with one  
361 cOmplete EDTA-free protease inhibitor cocktail (Sigma) and lysed using a microfluidizer. Lysate  
362 was cleared (13,500RPM in an SS-34 rotor at 4C for 35 min) and loaded onto a 10mL gravity  
363 column of Ni-NTA agarose beads equilibrated in lysis buffer. The column was washed with 3  
364 volumes of lysis buffer, and protein was eluted in 30mL of Nickel B (50mM Tris pH8, 300mM  
365 NaCl, 400mM Imidazole, 0.2mM TCEP). The elute was concentrated to a volume of 5-10mL and  
366 diluted 10-fold with buffer S<sub>A</sub> (50mM HEPES pH7, 0.2mM TCEP). This was loaded onto a 5mL  
367 Sepharose Q HP columns on an FPLC and eluted using a gradient of buffer S<sub>B</sub> (S<sub>A</sub> + 1M NaCl).  
368 Peak fractions were concentrated to a volume of <2mL and loaded onto a size exclusion column  
369 (S200PG) equilibrated in 50mM Tris pH 8 and 300mM NaCl. Peak fractions were collected,  
370 concentrated, and flash frozen in liquid nitrogen. Purity of the sample was checked by SDS-  
371 PAGE at each step. At each step, phenylmethane sulfonyl fluoride (PMSF) was added to a final  
372 concentration of 1mM to reduce proteolysis.

373

### 374 **CA expression and purification**

375 To improve solubility, we expressed all variants of our 14C/45C/WM proteins as CA-Mpro-  
376 MBP-6xHis fusions, with a SARS Mpro protease cleavage site and 6xHis tag to aid in  
377 purification. BL21(DE3) cells containing the plasmid encoding variants of CA<sub>14C/45C</sub>-mpro-  
378 MBP6xHis were grown in Terrific Broth at 37°C to an OD<sub>600</sub> of 0.4-0.6, then protein expression



379 was induced with 0.5mM IPTG at 25°C and allowed to progress overnight. Cells were pelleted  
380 and pellets were resuspended in 40mL lysis buffer (50mM Tris pH8, 300mM NaCl, 0.2mM  
381 TCEP) and lysed using a microfluidizer. Lysate was cleared (13,500RPM in an SS-34 rotor at  
382 4°C for 35 min) and loaded onto a 10mL gravity column of Ni-NTA agarose beads equilibrated  
383 in lysis buffer. The column was washed with 3 volumes of lysis buffer, and protein was eluted in  
384 30mL of Nickel B buffer (lysis buffer + 400mM imidazole). The elute was concentrated to a  
385 volume of 5-10mL and diluted 10-fold with buffer Q<sub>A</sub> (50mM Tris pH8, 0.2mM TCEP). This was  
386 loaded onto 2 stacked 5mL Separhose Q HP columns and eluted using a gradient of buffer Q<sub>B</sub>  
387 (Q<sub>A</sub> + 1M NaCl). All proteins eluted between 5 and 15% buffer Q<sub>B</sub>. Mpro protease [39] was  
388 added directly to the peak fractions and allowed to incubate at 4 degrees. After 2 days, this  
389 protein was diluted with buffer S<sub>A</sub> (25mM HEPES pH 7, 0.2mM TCEP) and loaded onto  
390 Sepharose SP columns and eluted using a gradient of buffer S<sub>B</sub> (S<sub>A</sub> + 1M NaCl). Proteins eluted  
391 between 5-10% buffer S<sub>B</sub>. Peak fractions were concentrated to a protein concentration of 10-  
392 15mg/ml and dialyzed for 4 hours at 4°C into storage buffer (50mM Tris, 75mM NaCl, 30mM  
393 BME). Purity of sample was checked by SDS-PAGE at each purification step.

394

#### 395 Co-pelleting assay

396 CA tubes were assembled by dialysis for 2 nights at high salt (50mM Tris pH 8, 1M NaCl) and  
397 subsequently one night at no salt (50mM Tris pH8). Concentrations were normalized through  
398 quantification of the CA bands on SAD-PAGE gels. Co-pelleting assays were performed with  
399 3uM of MxB<sub>1-35</sub>-MBPdi or control proteins, and 100uM CA. Stock solutions of capsid tubes  
400 (200uM) and MxB<sub>1-35</sub>-MBPdi, MBP, or CC-Cyp proteins (6uM) were prepared. CA tubes were  
401 diluted in CA buffer (50mM Tris pH 8). Test proteins were diluted with twice the final  
402 concentration of salt in buffer containing 50mM Tris pH 8 and 150/300/600mM NaCl. Samples  
403 were prepared in 1.5mL Eppendorf tubes by combining 24ul of MxB<sub>1-35</sub>-MBPdi or control protein  
404 and 24ul of CA (or 50mM Tris pH8 for CA- controls) and incubated for 30 minutes at room

405 temperature on a Nutator mixer. After 30 minutes, a 14ul “total” sample was removed and the  
406 remaining 28ul were centrifuged for 15 minutes at 4°C, 20,000RPM in an SS-34 rotor. The  
407 soluble fraction was subsequently removed and the pellet resuspended in 28ul of 50mM Tris pH8.  
408 Gel samples of the soluble fraction were made by taking 14ul of the soluble fraction and adding  
409 loading dye. 4ul of each gel sample was analyzed by SDS-PAGE (Invitrogen) and stained using  
410 SimplyBlue stain (Thermo Fisher). ImageStudioLite was used to quantify proteins of interest in  
411 the total and soluble fractions. The fraction of protein bound to CA was calculated by subtracting  
412 the ratio of soluble to total protein of interest from 1. The data were graphed with standard  
413 deviation using Prism 7.

414

#### 415 Molecular dynamics (MD) simulations

416 The 3D structure of first 35 residues of MxB (MxB<sub>1-35</sub>) was built de novo in Rosetta3 [40] and  
417 then equilibrated in a water box for 500 ns. The structure of native HIV-1 CA monomer  
418 (PDB:4XFX) was used to build the CA tri-hexamer model (Fig 4A, B). The equilibrated MxB<sub>1-35</sub>  
419 was initially placed above the tri-hexamer region. The combined structure was then solvated with  
420 TIP3P water [41] and neutralized by NaCl at 150 mM concentration. The resulting model had a  
421 total atom number of about 150,000 (Fig 4B), included protein, ions and water, in a simulation  
422 dimension of 125 x 121 x 138 Å<sup>3</sup>.

423 After model building, the systems were initially subjected to a minimization and  
424 thermalization step. During thermalization the system was heated from 50K to 310K in 20K  
425 increments. Subsequently, the whole systems were equilibrated for over 20 ns, while the carbon  
426 alpha of the peripheral helices of CA monomer and one end of MxB<sub>1-35</sub> were restrained. The  
427 minimization, thermalization and equilibration steps were completed in NAMD2.12 [42].

428 This equilibrated model was then run on a special purpose computer Anton2 [43]  
429 in the Pittsburgh supercomputing center for a total simulation time of 30 μs. To mimic the

430 CA hexamer lattice in the simulation, the  $C\alpha$  atoms of three sets of CA  $\alpha$ -helices on the  
431 peripheries of the tri-hexamer model were applied with a harmonic restraint of 1 Kcal/mol  
432  $\text{\AA}^2$  in x, y and z directions. Also, the  $C\alpha$  atoms of MxB residue 35 was applied a  
433 harmonic restraint of 1 Kcal/mol  $\text{\AA}^2$  at 40 $\text{\AA}$  away from the COM (center of mass) of CA in  
434 z direction. CHARMM 36 [44] force field was employed for all simulations. During the  
435 simulation, the temperature (310 K) and pressure (1 atm) was maintained by employing  
436 the Multigrator integrator [45] and the simulation time step was set to 2.5 fs/step, with  
437 short-range forces evaluated at every time step, and long-range electrostatics evaluated  
438 at every second time step. Short-range non-bonded interactions were cut off at 17  $\text{\AA}$ ;  
439 long range electrostatics were calculated using the k-Gaussian Split Ewald method [46].

440

#### 441 MD trajectory analysis

442 The trajectory analyses were performed in VMD [47]. The MxB-CA contacts and their occupancy  
443 scores were calculated by a homemade Tcl script. The secondary structure of MxB and ion  
444 occupancies were calculated with VMD plugins TimeLine and VolMap Tool, respectively.

445

#### 446 Crystallization and crystal structure analysis

447 CA crystals were obtained using the microbatch under oil method [48]. Purified CA P207S,  
448 G208R, or T210K was diluted to 1mg/ml (P207S) or 0.5 mg/ml (G208R or T210K) in 50mM  
449 Tris pH 8 buffer. 1ul of protein solution was mixed with 1ul precipitant solution (15% PEG3350,  
450 0.1M NaI, 0.1M buffer) under oil (2:1 parafin: silicon). P207S crystals were grown with  
451 BisTrisPropane pH 6.5 while G208R and T210K were grown with Sodium Cacodylate pH 6.6  
452 and 5.8 respectively. Crystals were harvested after several weeks of growth, cryo-protected in  
453 paratone oil and flash frozen in liquid nitrogen. Data were collected at the Advanced Photon  
454 Source, NE-CAT beamline 24-ID-C. Data processing was performed in XDS [49, 50]. The  
455 structure of WT CA (PDB: 4XFX) was used as a model for molecular replacement with the CCP4

456 program Phaser [25, 51-53]. Iterative refinement and manual rebuilding were performed using  
457 Refmac5, Phenix, and Coot [54-56]. Molecular graphics were generated using PyMol [57] and  
458 the MxB-capsid model was generated using Chimera [58].

459

#### 460 **Electron Microscopy**

461 Assembled CA tubes were diluted to 10uM in 50mM Tris pH 8 and negative-stained with uranyl  
462 acetate onto holey carbon grids after glow-discharge. Grids were examined on an FEI Talos  
463 L120C microscope and images at 57,000X magnification were collected using TEM Imaging and  
464 Analysis software (Gatan).

465

#### 466 **Acknowledgements**

467 We thank the staff at the Advanced Photon Source beamline 24ID-C. Anton computing time was  
468 provided by the Pittsburgh Supercomputing Center (PSC) and the Anton machine was  
469 generously made available by D.E.Shaw Research.

470

## 471 References

- 472 1. Haller O, Staeheli P, Schwemmle M, Kochs G. Mx GTPases: dynamin-like  
473 antiviral machines of innate immunity. *Trends Microbiol.* 2015;23(3):154-63. doi:  
474 10.1016/j.tim.2014.12.003. PubMed PMID: 25572883.
- 475 2. Jaguva Vasudevan AA, Bahr A, Grothmann R, Singer A, Haussinger D,  
476 Zimmermann A, et al. MXB inhibits murine cytomegalovirus. *Virology.*  
477 2018;522:158-67. doi: 10.1016/j.virol.2018.07.017. PubMed PMID: 30032029.
- 478 3. Schilling M, Bulli L, Weigang S, Graf L, Naumann S, Patzina C, et al. Human  
479 MxB Protein Is a Pan-herpesvirus Restriction Factor. *J Virol.* 2018;92(17). doi:  
480 10.1128/JVI.01056-18. PubMed PMID: 29950411; PubMed Central PMCID:  
481 PMC6096802.
- 482 4. Cramer M, Bauer M, Caduff N, Walker R, Steiner F, Franzoso FD, et al. MxB is  
483 an interferon-induced restriction factor of human herpesviruses. *Nat Commun.*  
484 2018;9(1):1980. doi: 10.1038/s41467-018-04379-2. PubMed PMID: 29773792;  
485 PubMed Central PMCID: PMC5958057.
- 486 5. Liu Z, Pan Q, Ding S, Qian J, Xu F, Zhou J, et al. The interferon-inducible MxB  
487 protein inhibits HIV-1 infection. *Cell host & microbe.* 2013;14(4):398-410. doi:  
488 10.1016/j.chom.2013.08.015. PubMed PMID: 24055605.
- 489 6. Kane M, Yadav SS, Bitzegeio J, Kutluay SB, Zang T, Wilson SJ, et al. MX2 is an  
490 interferon-induced inhibitor of HIV-1 infection. *Nature.* 2013;502(7472):563-6. doi:  
491 10.1038/nature12653. PubMed PMID: 24121441; PubMed Central PMCID:  
492 PMC3912734.
- 493 7. Goujon C, Moncorge O, Bauby H, Doyle T, Ward CC, Schaller T, et al. Human  
494 MX2 is an interferon-induced post-entry inhibitor of HIV-1 infection. *Nature.*  
495 2013;502(7472):559-62. doi: 10.1038/nature12542. PubMed PMID: 24048477;  
496 PubMed Central PMCID: PMC3808269.
- 497 8. King MC, Raposo G, Lemmon MA. Inhibition of nuclear import and cell-cycle  
498 progression by mutated forms of the dynamin-like GTPase MxB. *Proceedings of the*  
499 *National Academy of Sciences of the United States of America.* 2004;101(24):8957-  
500 62. doi: 10.1073/pnas.0403167101. PubMed PMID: 15184662; PubMed Central  
501 PMCID: PMC428454.
- 502 9. Busnadiego I, Kane M, Rihn SJ, Preugschas HF, Hughes J, Blanco-Melo D, et al.  
503 Host and viral determinants of Mx2 antiretroviral activity. *J Virol.*  
504 2014;88(14):7738-52. doi: 10.1128/JVI.00214-14. PubMed PMID: 24760893;  
505 PubMed Central PMCID: PMCPMC4097781.
- 506 10. Gao S, von der Malsburg A, Dick A, Faelber K, Schroder GF, Haller O, et al.  
507 Structure of myxovirus resistance protein a reveals intra- and intermolecular  
508 domain interactions required for the antiviral function. *Immunity.* 2011;35(4):514-  
509 25. Epub 2011/10/04. doi: 10.1016/j.immuni.2011.07.012. PubMed PMID:  
510 21962493.
- 511 11. Fribourgh JL, Nguyen HC, Matreyek KA, Alvarez FJ, Summers BJ, Dewdney TG,  
512 et al. Structural insight into HIV-1 restriction by MxB. *Cell host & microbe.*  
513 2014;16(5):627-38. doi: 10.1016/j.chom.2014.09.021. PubMed PMID: 25312384;  
514 PubMed Central PMCID: PMC4252739.

- 515 12. Xu B, Kong J, Wang X, Wei W, Xie W, Yu XF. Structural insight into the  
516 assembly of human anti-HIV dynamin-like protein MxB/Mx2. *Biochemical and*  
517 *biophysical research communications*. 2015;456(1):197-201. doi:  
518 10.1016/j.bbrc.2014.11.058. PubMed PMID: 25446123.
- 519 13. Fricke T, White TE, Schulte B, de Souza Aranha Vieira DA, Dharan A, Campbell  
520 EM, et al. MxB binds to the HIV-1 core and prevents the uncoating process of HIV-1.  
521 *Retrovirology*. 2014;11:68. doi: 10.1186/s12977-014-0068-x  
522 10.1186/PREACCEPT-6453674081373986. PubMed PMID: 25123063; PubMed  
523 Central PMCID: PMC4145229.
- 524 14. Goujon C, Greenbury RA, Papaioannou S, Doyle T, Malim MH. A triple-  
525 arginine motif in the amino-terminal domain and oligomerization are required for  
526 HIV-1 inhibition by human MX2. *J Virol*. 2015;89(8):4676-80. doi:  
527 10.1128/JVI.00169-15. PubMed PMID: 25673704; PubMed Central PMCID:  
528 PMC4442396.
- 529 15. Schulte B, Buffone C, Opp S, Di Nunzio F, De Souza Aranha Vieira DA,  
530 Brandariz-Nunez A, et al. Restriction of HIV-1 Requires the N-Terminal Region of  
531 MxB as a Capsid-Binding Motif but Not as a Nuclear Localization Signal. *J Virol*.  
532 2015;89(16):8599-610. doi: 10.1128/JVI.00753-15. PubMed PMID: 26063425;  
533 PubMed Central PMCID: PMC4524248.
- 534 16. Francis AC, Melikyan GB. Single HIV-1 Imaging Reveals Progression of  
535 Infection through CA-Dependent Steps of Docking at the Nuclear Pore, Uncoating,  
536 and Nuclear Transport. *Cell host & microbe*. 2018;23(4):536-48 e6. Epub  
537 2018/04/13. doi: 10.1016/j.chom.2018.03.009. PubMed PMID: 29649444; PubMed  
538 Central PMCID: PMCPMC5901770.
- 539 17. Yamashita M, Engelman AN. Capsid-Dependent Host Factors in HIV-1  
540 Infection. *Trends Microbiol*. 2017;25(9):741-55. doi: 10.1016/j.tim.2017.04.004.  
541 PubMed PMID: 28528781; PubMed Central PMCID: PMC5562514.
- 542 18. Matreyek KA, Wang W, Serrao E, Singh PK, Levin HL, Engelman A. Host and  
543 viral determinants for MxB restriction of HIV-1 infection. *Retrovirology*. 2014;11:90.  
544 doi: 10.1186/s12977-014-0090-z. PubMed PMID: 25348155; PubMed Central  
545 PMCID: PMC4213484.
- 546 19. Kong J, Xu B, Wei W, Wang X, Xie W, Yu XF. Characterization of the amino-  
547 terminal domain of Mx2/MxB-dependent interaction with the HIV-1 capsid. *Protein*  
548 *& cell*. 2014;5(12):954-7. doi: 10.1007/s13238-014-0113-5. PubMed PMID:  
549 25363729; PubMed Central PMCID: PMC4259888.
- 550 20. Goujon C, Moncorge O, Bauby H, Doyle T, Barclay WS, Malim MH. Transfer of  
551 the amino-terminal nuclear envelope targeting domain of human MX2 converts MX1  
552 into an HIV-1 resistance factor. *J Virol*. 2014;88(16):9017-26. doi:  
553 10.1128/JVI.01269-14. PubMed PMID: 24899177; PubMed Central PMCID:  
554 PMC4136259.
- 555 21. Stremlau M, Perron M, Lee M, Li Y, Song B, Javanbakht H, et al. Specific  
556 recognition and accelerated uncoating of retroviral capsids by the TRIM5alpha  
557 restriction factor. *Proceedings of the National Academy of Sciences of the United*  
558 *States of America*. 2006;103(14):5514-9. Epub 2006/03/17. doi:  
559 10.1073/pnas.0509996103. PubMed PMID: 16540544; PubMed Central PMCID:  
560 PMCPMC1459386.



- 561 22. Matreyek KA, Yucel SS, Li X, Engelman A. Nucleoporin NUP153  
562 phenylalanine-glycine motifs engage a common binding pocket within the HIV-1  
563 capsid protein to mediate lentiviral infectivity. *PLoS pathogens*.  
564 2013;9(10):e1003693. Epub 2013/10/17. doi: 10.1371/journal.ppat.1003693.  
565 PubMed PMID: 24130490; PubMed Central PMCID: PMC3795039.
- 566 23. Henning MS, Dubose BN, Burse MJ, Aiken C, Yamashita M. In vivo functions of  
567 CPSF6 for HIV-1 as revealed by HIV-1 capsid evolution in HLA-B27-positive  
568 subjects. *PLoS pathogens*. 2014;10(1):e1003868. Epub 2014/01/15. doi:  
569 10.1371/journal.ppat.1003868. PubMed PMID: 24415937; PubMed Central PMCID:  
570 PMC3887095.
- 571 24. Pornillos O, Ganser-Pornillos BK, Kelly BN, Hua Y, Whitby FG, Stout CD, et al.  
572 X-ray structures of the hexameric building block of the HIV capsid. *Cell*.  
573 2009;137(7):1282-92. doi: 10.1016/j.cell.2009.04.063. PubMed PMID: 19523676;  
574 PubMed Central PMCID: PMC2840706.
- 575 25. Gres AT, Kirby KA, KewalRamani VN, Tanner JJ, Pornillos O, Sarafianos SG.  
576 STRUCTURAL VIROLOGY. X-ray crystal structures of native HIV-1 capsid protein  
577 reveal conformational variability. *Science*. 2015;349(6243):99-103. doi:  
578 10.1126/science.aaa5936. PubMed PMID: 26044298; PubMed Central PMCID:  
579 PMC4584149.
- 580 26. De Luca A, Sidumo ZJ, Zanelli G, Magid NA, Luhanga R, Brambilla D, et al.  
581 Accumulation of HIV-1 drug resistance in patients on a standard thymidine  
582 analogue-based first line antiretroviral therapy after virological failure: implications  
583 for the activity of next-line regimens from a longitudinal study in Mozambique. *BMC*  
584 *Infect Dis*. 2017;17(1):605. Epub 2017/09/06. doi: 10.1186/s12879-017-2709-x.  
585 PubMed PMID: 28870148; PubMed Central PMCID: PMC5584020.
- 586 27. Alvarez FJD, He S, Perilla JR, Jang S, Schulten K, Engelman AN, et al. CryoEM  
587 structure of MxB reveals a novel oligomerization interface critical for HIV  
588 restriction. *Sci Adv*. 2017;3(9):e1701264. doi: 10.1126/sciadv.1701264. PubMed  
589 PMID: 28929138; PubMed Central PMCID: PMC5600524.
- 590 28. Liu Z, Pan Q, Liang Z, Qiao W, Cen S, Liang C. The highly polymorphic  
591 cyclophilin A-binding loop in HIV-1 capsid modulates viral resistance to MxB.  
592 *Retrovirology*. 2015;12:1. doi: 10.1186/s12977-014-0129-1. PubMed PMID:  
593 25571928; PubMed Central PMCID: PMC4300040.
- 594 29. Franke EK, Yuan HE, Luban J. Specific incorporation of cyclophilin A into HIV-  
595 1 virions. *Nature*. 1994;372(6504):359-62. doi: 10.1038/372359a0. PubMed PMID:  
596 7969494.
- 597 30. Braaten D, Ansari H, Luban J. The hydrophobic pocket of cyclophilin is the  
598 binding site for the human immunodeficiency virus type 1 Gag polyprotein. *J Virol*.  
599 1997;71(3):2107-13. Epub 1997/03/01. PubMed PMID: 9032343; PubMed Central  
600 PMCID: PMC191305.
- 601 31. Byeon IJ, Meng X, Jung J, Zhao G, Yang R, Ahn J, et al. Structural convergence  
602 between Cryo-EM and NMR reveals intersubunit interactions critical for HIV-1  
603 capsid function. *Cell*. 2009;139(4):780-90. doi: 10.1016/j.cell.2009.10.010. PubMed  
604 PMID: 19914170; PubMed Central PMCID: PMC2782912.
- 605 32. Yufenyuy EL, Aiken C. The NTD-CTD intersubunit interface plays a critical  
606 role in assembly and stabilization of the HIV-1 capsid. *Retrovirology*. 2013;10:29.

- 607 doi: 10.1186/1742-4690-10-29. PubMed PMID: 23497318; PubMed Central PMCID:  
608 PMC3623829.
- 609 33. von Schwedler UK, Stray KM, Garrus JE, Sundquist WI. Functional surfaces of  
610 the human immunodeficiency virus type 1 capsid protein. *J Virol.* 2003;77(9):5439-  
611 50. PubMed PMID: 12692245; PubMed Central PMCID: PMC153941.
- 612 34. Obal G, Trajtenberg F, Carrion F, Tome L, Larrieux N, Zhang X, et al.  
613 STRUCTURAL VIROLOGY. Conformational plasticity of a native retroviral capsid  
614 revealed by x-ray crystallography. *Science.* 2015;349(6243):95-8. doi:  
615 10.1126/science.aaa5182. PubMed PMID: 26044299.
- 616 35. Bailey GD, Hyun JK, Mitra AK, Kingston RL. A structural model for the  
617 generation of continuous curvature on the surface of a retroviral capsid. *J Mol Biol.*  
618 2012;417(3):212-23. doi: 10.1016/j.jmb.2012.01.014. PubMed PMID: 22306463.
- 619 36. Folio C, Sierra N, Dujardin M, Alvarez G, Guillon C. Crystal Structure of the  
620 Full-Length Feline Immunodeficiency Virus Capsid Protein Shows an N-Terminal  
621 beta-Hairpin in the Absence of N-Terminal Proline. *Viruses.* 2017;9(11). doi:  
622 10.3390/v9110335. PubMed PMID: 29120364; PubMed Central PMCID:  
623 PMC5707542.
- 624 37. Jin Z, Jin L, Peterson DL, Lawson CL. Model for lentivirus capsid core  
625 assembly based on crystal dimers of EIAV p26. *J Mol Biol.* 1999;286(1):83-93. doi:  
626 10.1006/jmbi.1998.2443. PubMed PMID: 9931251.
- 627 38. Lee K, Ambrose Z, Martin TD, Oztop I, Mulky A, Julias JG, et al. Flexible use of  
628 nuclear import pathways by HIV-1. *Cell host & microbe.* 2010;7(3):221-33. doi:  
629 10.1016/j.chom.2010.02.007. PubMed PMID: 20227665; PubMed Central PMCID:  
630 PMC2841689.
- 631 39. Yang H, Yang M, Ding Y, Liu Y, Lou Z, Zhou Z, et al. The crystal structures of  
632 severe acute respiratory syndrome virus main protease and its complex with an  
633 inhibitor. *Proceedings of the National Academy of Sciences of the United States of*  
634 *America.* 2003;100(23):13190-5. doi: 10.1073/pnas.1835675100. PubMed PMID:  
635 14585926; PubMed Central PMCID: PMC263746.
- 636 40. Leaver-Fay A, Tyka M, Lewis SM, Lange OF, Thompson J, Jacak R, et al.  
637 ROSETTA3: an object-oriented software suite for the simulation and design of  
638 macromolecules. *Methods Enzymol.* 2011;487:545-74. doi: 10.1016/B978-0-12-  
639 381270-4.00019-6. PubMed PMID: 21187238; PubMed Central PMCID:  
640 PMC4083816.
- 641 41. Jorgensen WL, Jenson C. Temperature dependence of TIP3P, SPC, and TIP4P  
642 water from NPT Monte Carlo simulations: Seeking temperatures of maximum  
643 density. *Journal of Computational Chemistry.* 1998;19(10):1179-86. doi: Doi  
644 10.1002/(Sici)1096-987x(19980730)19:10<1179::Aid-Jcc6>3.0.Co;2-J. PubMed  
645 PMID: WOS:000074440800008.
- 646 42. Phillips JC, Braun R, Wang W, Gumbart J, Tajkhorshid E, Villa E, et al. Scalable  
647 molecular dynamics with NAMD. *J Comput Chem.* 2005;26(16):1781-802. doi:  
648 10.1002/jcc.20289. PubMed PMID: 16222654; PubMed Central PMCID:  
649 PMC4083816.
- 650 43. Shaw DE, Grossman JP, Bank JA, Batson B, Butts JA, Chao JC, et al. Anton 2:  
651 raising the bar for performance and programmability in a special-purpose  
652 molecular dynamics supercomputer. *Proceedings of the International Conference*



- 653 for High Performance Computing, Networking, Storage and Analysis; New Orleans,  
654 Louisiana. 2683599: IEEE Press; 2014. p. 41-53.
- 655 44. Best RB, Zhu X, Shim J, Lopes PE, Mittal J, Feig M, et al. Optimization of the  
656 additive CHARMM all-atom protein force field targeting improved sampling of the  
657 backbone phi, psi and side-chain chi(1) and chi(2) dihedral angles. *J Chem Theory*  
658 *Comput.* 2012;8(9):3257-73. doi: 10.1021/ct300400x. PubMed PMID: 23341755;  
659 PubMed Central PMCID: PMC3549273.
- 660 45. Lippert RA, Predescu C, Ierardi DJ, Mackenzie KM, Eastwood MP, Dror RO, et  
661 al. Accurate and efficient integration for molecular dynamics simulations at constant  
662 temperature and pressure. *J Chem Phys.* 2013;139(16):164106. doi:  
663 10.1063/1.4825247. PubMed PMID: 24182003.
- 664 46. Shan Y, Klepeis JL, Eastwood MP, Dror RO, Shaw DE. Gaussian split Ewald: A  
665 fast Ewald mesh method for molecular simulation. *J Chem Phys.*  
666 2005;122(5):54101. doi: 10.1063/1.1839571. PubMed PMID: 15740304.
- 667 47. Humphrey W, Dalke A, Schulten K. VMD: visual molecular dynamics. *J Mol*  
668 *Graph.* 1996;14(1):33-8, 27-8. doi: [http://dx.doi.org/10.1016/0263-](http://dx.doi.org/10.1016/0263-7855(96)00018-5)  
669 [7855\(96\)00018-5](http://dx.doi.org/10.1016/0263-7855(96)00018-5). PubMed PMID: 8744570.
- 670 48. Chayen NE, Shaw Stewart PD, Blow DM. Microbatch crystallization under oil  
671 — a new technique allowing many small-volume crystallization trials. *Journal of*  
672 *Crystal Growth.* 1992;122(1):176-80. doi: [https://doi.org/10.1016/0022-](https://doi.org/10.1016/0022-0248(92)90241-A)  
673 [0248\(92\)90241-A](https://doi.org/10.1016/0022-0248(92)90241-A).
- 674 49. Kabsch W. Xds. *Acta Crystallogr D Biol Crystallogr.* 2010;66(Pt 2):125-32.  
675 doi: 10.1107/S0907444909047337. PubMed PMID: 20124692; PubMed Central  
676 PMCID: PMC2815665.
- 677 50. Kabsch W. Integration, scaling, space-group assignment and post-refinement.  
678 *Acta Crystallogr D Biol Crystallogr.* 2010;66(Pt 2):133-44. doi:  
679 10.1107/S0907444909047374. PubMed PMID: 20124693; PubMed Central PMCID:  
680 PMC2815666.
- 681 51. McCoy AJ, Grosse-Kunstleve RW, Adams PD, Winn MD, Storoni LC, Read RJ.  
682 Phaser crystallographic software. *J Appl Crystallogr.* 2007;40(Pt 4):658-74. doi:  
683 10.1107/S0021889807021206. PubMed PMID: 19461840; PubMed Central PMCID:  
684 PMC2483472.
- 685 52. Collaborative Computational Project N. The CCP4 suite: programs for protein  
686 crystallography. *Acta Crystallogr D Biol Crystallogr.* 1994;50(Pt 5):760-3. doi:  
687 10.1107/S0907444994003112. PubMed PMID: 15299374.
- 688 53. Winn MD, Ballard CC, Cowtan KD, Dodson EJ, Emsley P, Evans PR, et al.  
689 Overview of the CCP4 suite and current developments. *Acta Crystallogr D Biol*  
690 *Crystallogr.* 2011;67(Pt 4):235-42. doi: 10.1107/S0907444910045749. PubMed  
691 PMID: 21460441; PubMed Central PMCID: PMC3069738.
- 692 54. Murshudov GN, Vagin AA, Dodson EJ. Refinement of macromolecular  
693 structures by the maximum-likelihood method. *Acta Crystallogr D Biol Crystallogr.*  
694 1997;53(Pt 3):240-55. doi: 10.1107/S0907444996012255. PubMed PMID:  
695 15299926.
- 696 55. Emsley P, Cowtan K. Coot: model-building tools for molecular graphics. *Acta*  
697 *Crystallogr D Biol Crystallogr.* 2004;60(Pt 12 Pt 1):2126-32. doi:  
698 10.1107/S0907444904019158. PubMed PMID: 15572765.

- 699 56. Adams PD, Afonine PV, Bunkoczi G, Chen VB, Davis IW, Echols N, et al.  
700 PHENIX: a comprehensive Python-based system for macromolecular structure  
701 solution. *Acta Crystallogr D Biol Crystallogr*. 2010;66(Pt 2):213-21. doi:  
702 10.1107/S0907444909052925. PubMed PMID: 20124702; PubMed Central PMCID:  
703 PMC2815670.
- 704 57. Schrodinger, LLC. The PyMOL Molecular Graphics System, Version 1.8. 2015.
- 705 58. Pettersen EF, Goddard TD, Huang CC, Couch GS, Greenblatt DM, Meng EC, et  
706 al. UCSF Chimera--a visualization system for exploratory research and analysis. *J*  
707 *Comput Chem*. 2004;25(13):1605-12. Epub 2004/07/21. doi: 10.1002/jcc.20084.  
708 PubMed PMID: 15264254.
- 709
- 710

711 **Figures and legends**

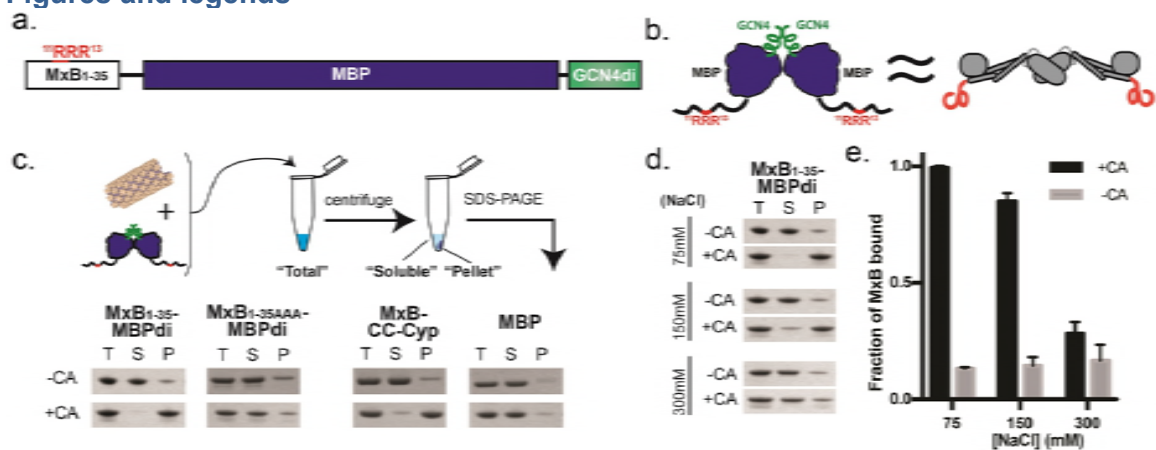

712 **Figure 1: An MxB-MBP dimer construct binds CA helical tubes in vitro**

- 713 a. Construct schematic of MxB<sub>1-35</sub>-MBPdi.
- 714 b. Cartoon model of MxB<sub>1-35</sub>-MBPdi (left), which mimics the extended dimer
- 715 architecture of the full-length MxB protein (right).
- 716 c. Top: Diagram of the co-pelleting assay. Purified CA tubes and MxB constructs
- 717 are incubated ("total"); after centrifugation, "soluble" and "pellet" fractions are
- 718 analyzed. Bottom: MxB<sub>1-35</sub>-MBPdi binds CA tubes. MxB<sub>1-35AAA</sub>-MBPdi, in which
- 719 the RRR CA-binding motif is mutated to AAA binds significantly less. MBP and
- 720 MBP-CC-Cyp are used as negative and positive controls, respectively.
- 721 d. MxB<sub>1-35</sub>-MBPdi binding to CA tubes is salt-dependent and is abolished at above
- 722 300mM NaCl.
- 723 e. Quantification of the co-pelleting assay in (d). The fraction of MxB bound was
- 724 computed for each sample by subtracting the soluble from the total and
- 725 normalized to the total. Error bars represent the standard error of the mean from
- 726 three independent experiments.
- 727
- 728
- 729

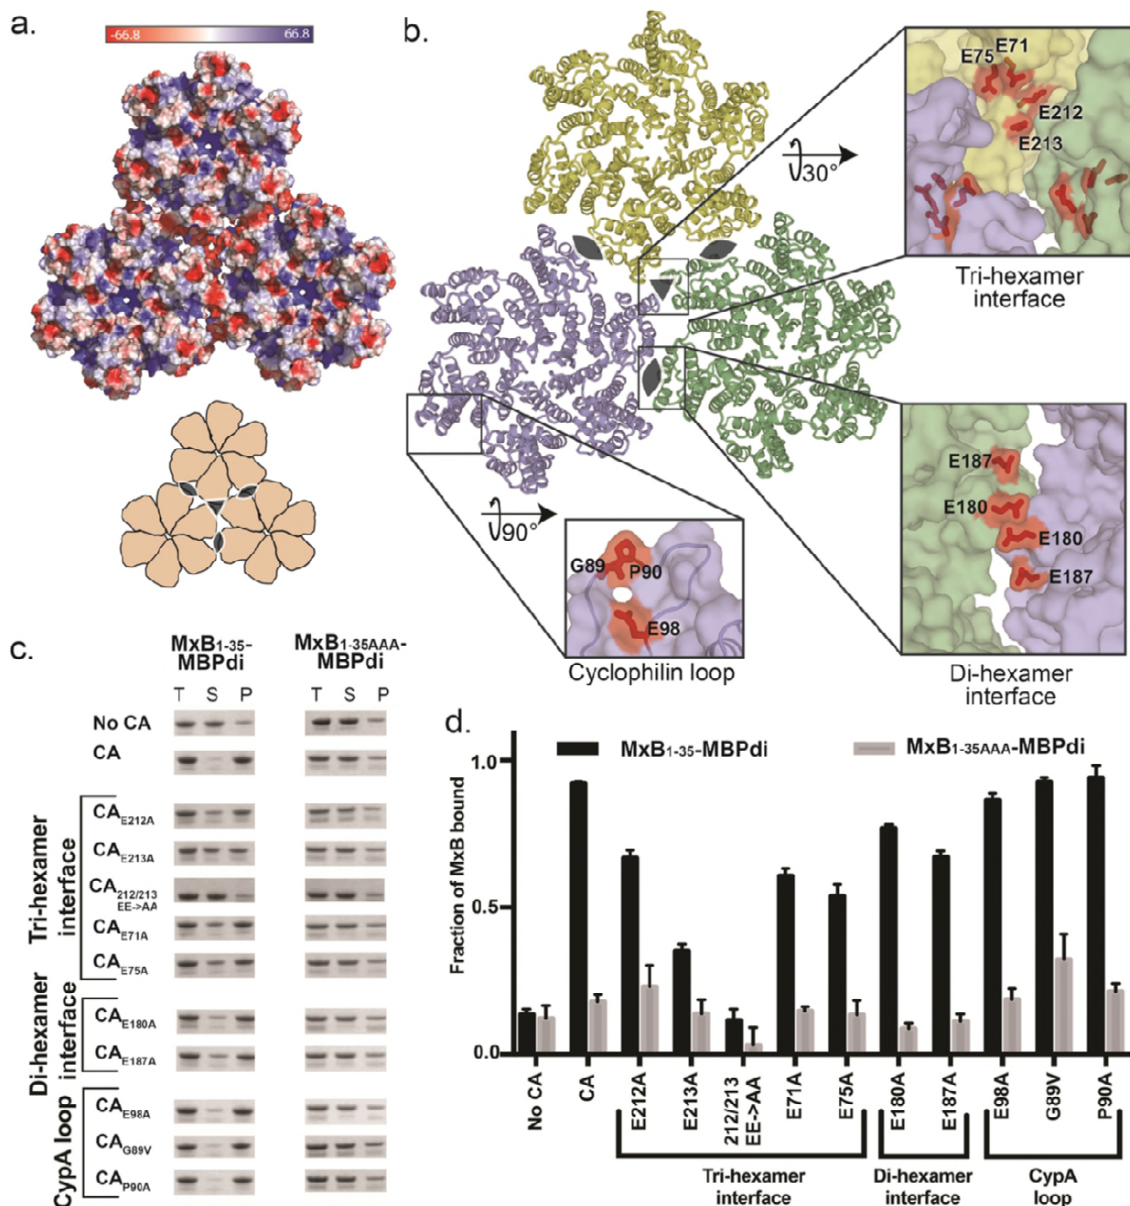

**Figure 2: The MxB binding site on capsid maps to the tri-hexamer interface.**

- 730  
731  
732  
733  
734  
735  
736  
737  
738  
739  
740  
741  
742  
743  
744
- Surface electrostatic potential distribution of three CA hexamers (PDB ID: 4XFX) shows the negative charge at the interfaces between the hexamers (major), and in the CypA-binding loop (minor). A cartoon (bottom) shows the overall arrangement of hexamers and the symmetry axes at the di-hexamer (cat eyes) and tri-hexamer (triangle) interfaces.
  - Location of CA residues selected for mutation. CA hexamers (surface) are shown in light blue, light yellow, and light green. Residues selected for mutation are shown in red sticks.
  - MxB<sub>1-35</sub>-MBPdi binding to CA tube variants in co-pelleting assays. The total, soluble, and pellet fractions were analyzed by SDS-PAGE. For simplicity, only the MxB<sub>1-35</sub>-MBPdi band is shown. MxB<sub>1-35AAA</sub>-MBPdi is used as a negative control. A notable reduction in MxB binding is observed for CA<sub>E212A</sub>, CA<sub>E213A</sub>, CA<sub>E71A</sub>, CA<sub>E75A</sub>, and CA<sub>E212/213 EE->AA</sub>. Positive and negative controls performed with MBP-



745  
746  
747  
748  
749  
750  
751  
752

- CCyP and MBP, respectively, can be found in Supplemental Appendix 1. Full gels can be found in Supplemental Appendix 1.
- d. Quantification of data in (c), performed as in Figure 1. Error bars represent the standard error of the mean from three independent experiments. Quantification of controls can be found in Supplemental Appendix 1.

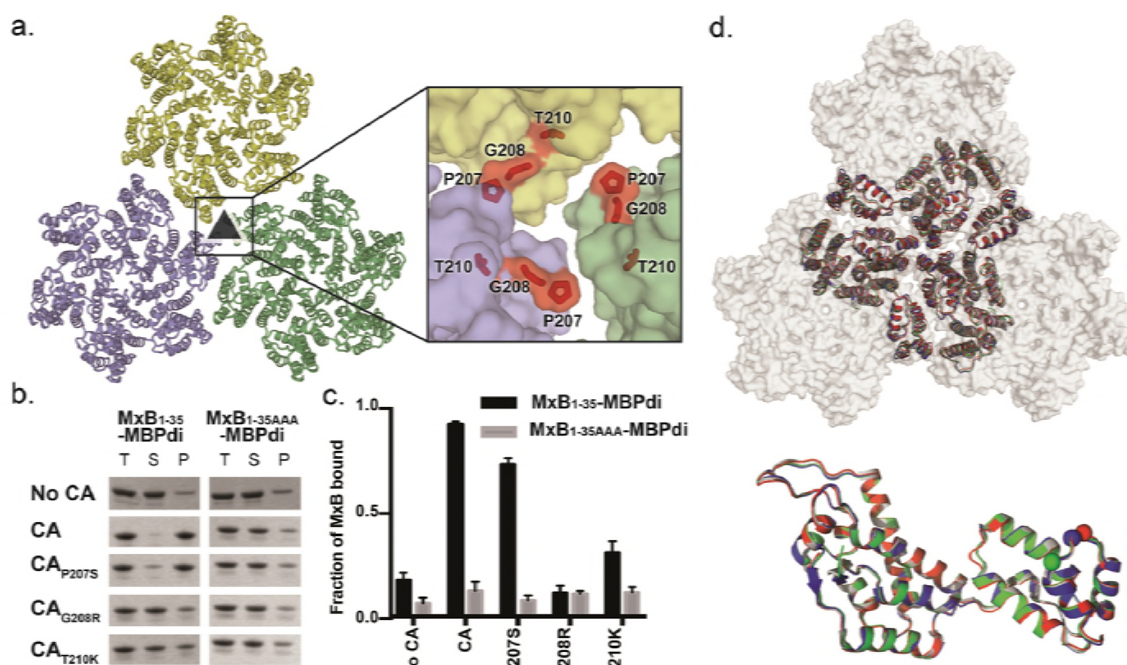

753  
754  
755  
756  
757  
758  
759  
760  
761  
762  
763  
764  
765  
766  
767  
768  
769  
770  
771

**Figure 3: CA mutations that escape MxB restriction severely reduce MxB<sub>1-35</sub>-MBPdi binding**

- a. P207, G208, and T210 (red sticks) are located at the interface between three CA hexamers (light blue, light green, light yellow surface).
- b. MxB<sub>1-35</sub>-MBPdi binding to CA tubes and CA tubes containing the mutations P207S, G208R in co-pelleting assays. The total, soluble, and pellet fractions were analyzed by SDS-PAGE. For simplicity, only the MxB<sub>1-35</sub>-MBPdi band is shown. Full gels and positive and negative controls performed with MBP-CCyP and MBP, respectively, are shown in Supplemental Appendix 1.
- c. Quantification of data in (b), performed as in figure 1. Error bars represent the standard error of the mean from three independent experiments. Quantification of the positive and negative controls can be found in Supplemental Appendix 1.
- d. Alignment of P207S (red), G208R (blue), and T210K (green) crystal structures to the structure of WT CA (white, PDB:4XFX) at the tri-hexamer interface (top) and within a monomer (bottom). All of the mutations preserve the wild-type lattice structure, with only minor differences.

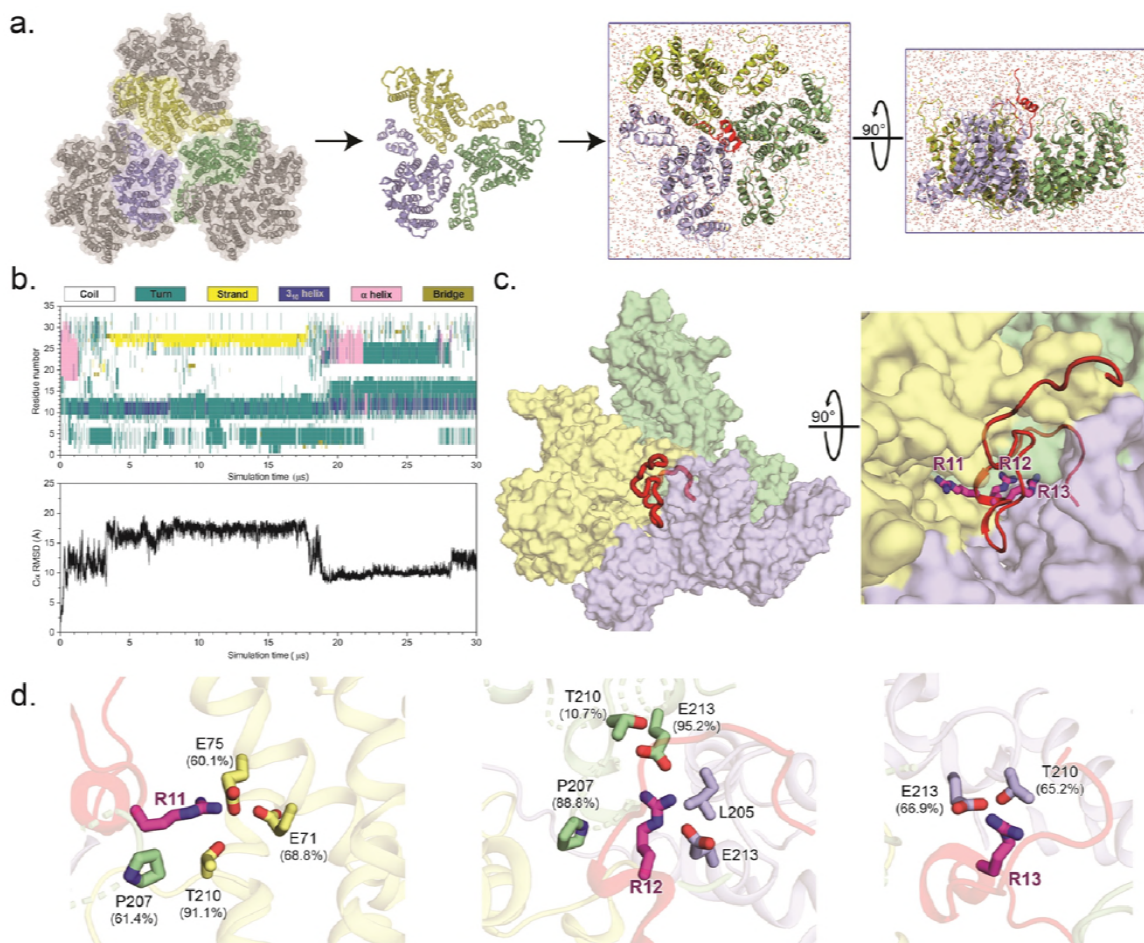

**Figure 4: All-atom molecular simulations identify MxB interactions at the tri-hexamer interface.**

- a. The all-atom model of MxB<sub>1-35</sub> at tri-hexamer interface. Three dimers from different hexamers are in blue, yellow and green (left). The MxB<sub>1-35</sub> peptide in red is placed above the middle of the tri-hexamer region before simulations (right).
- b. The dynamics of MxB<sub>1-35</sub> in tri-hexamer interface. The evolution of MxB secondary structure (top) during the simulation, computed by the STRIDE program in VMD and the root-mean-square deviation (RMSD) plot of the MxB Cα atoms (bottom).
- c. MxB<sub>1-35</sub> (red) binds in the tri-hexamer interface. The MxB <sup>11</sup>RRR<sup>13</sup> motif is shown in magenta sticks.
- d. Molecular contacts between the MxB <sup>11</sup>RRR<sup>13</sup> motif and experimentally tested CA residues are shown for R11 (left), R12 (middle), and R13 (right), with corresponding contact occupancies.

772  
773  
774  
775  
776  
777  
778  
779  
780  
781  
782  
783  
784  
785  
786  
787  
788

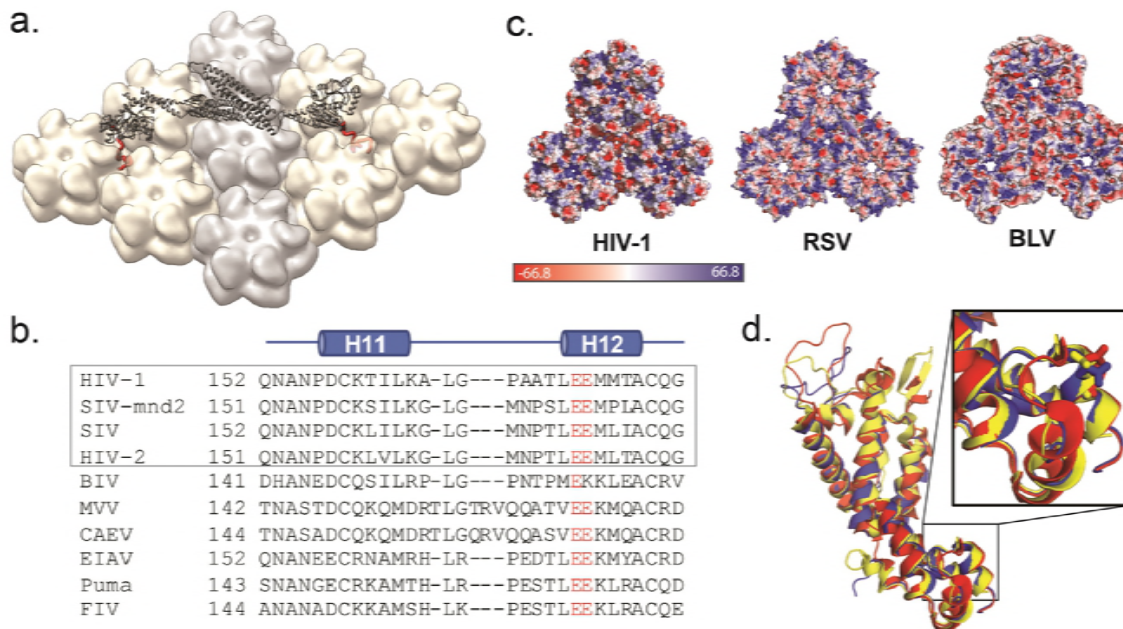

**Figure 5: MxB recognizes CA features that are potentially conserved in lentiviruses but not in retroviruses.**

- Model of MxB binding to the CA lattice, generated using existing structural data of the MxB dimer (gray, PDB ID: 4WHJ) and HIV CA (light gray/tan, PDB ID: 4XFX) and MD simulation data of the MxB N-terminal peptide binding to CA (red).
- Alignment of CA structures available from different lentiviruses: HIV (PDB:4XFX, red, EIAV (PDB ID: 2EIA, blue), FIV, PDB ID: 5NA2, yellow); residue E213 shown in sticks located in the same position in each CA.
- CA protein sequence alignment of lentiviruses. Gray box denotes primate lentiviruses, which are restricted by MxB. Residue E213 and its homologous residues (red) are conserved in the lentiviral family.
- Surface electrostatic potential distributions of diverse retroviral capsids show few shared characteristics at the tri-hexamer interface. The following structures are used in comparison: HIV-1 (PDB ID: 4XFX), RSV (PDB ID: 4TIR), BLV (PDB ID: 4PH0).

## SI captions:

**SI Appendix 1: Co-pelleting supplemental data.** Full SDS-PAGE gels of co-pelleting assays, including MBP and CC-Cyp controls their quantification.

**SI Appendix 2: Electron micrographs of negative stained CA tubes used in this study**

**SI Appendix 3: Additional molecular contacts.** Molecular contact figures between MxB residues, K6 (left), W8 (middle), and Y10 (right), and CA residues.

**SI Appendix 4: Ion occupancies.** The ion occupancies of sodium (top) and chloride (bottom) calculated from the MD trajectory.

820

821 **SI Movie-1: The 30  $\mu$ s MD simulation of MxB<sub>1-35</sub> interacting with the CA tri-hexamer**
